# Supplementary material
Source: PubMed Central journal article supplement (PMC4826792)
Supplement: NIHMS756722-supplement-125_2016_3874_MOESM3_ESM.pdf [file NIHMS756722-supplement-125_2016_3874_MOESM3_ESM.pdf]

**Supplementary Table 1.** List of assays, manufacturer, and type of sample.

| <b>Hormone Measured</b>                      | <b>Type of Assay</b>                | <b>Blood serum or Plasma</b> | <b>Manufacturer</b>                                |
|----------------------------------------------|-------------------------------------|------------------------------|----------------------------------------------------|
| Amylase, ALP, ALT, AST, GGT, lipase, glucose | Measured by LabCorp                 | Plasma                       | LabCorp (Raritan, NJ), a CLIA-certified laboratory |
| Amylin                                       | ELISA                               | Serum                        | Millipore Co. Billerica, MA USA                    |
| Fructosamine                                 | Standardized kit (cat#04537939-190) | Serum                        | Roche cobas c311                                   |
| GLP-1                                        | RIA                                 | Plasma                       | Millipore Co. Billerica, MA USA                    |
| Insulin                                      | Standardized kit (LKIN1)            | Plasma                       | Immulin 1000 Insulin (Siemens)                     |
