# Supplementary material
Source: PubMed Central journal article supplement (PMC4826792)

**Supplementary Figure 1.** Study flow diagram.

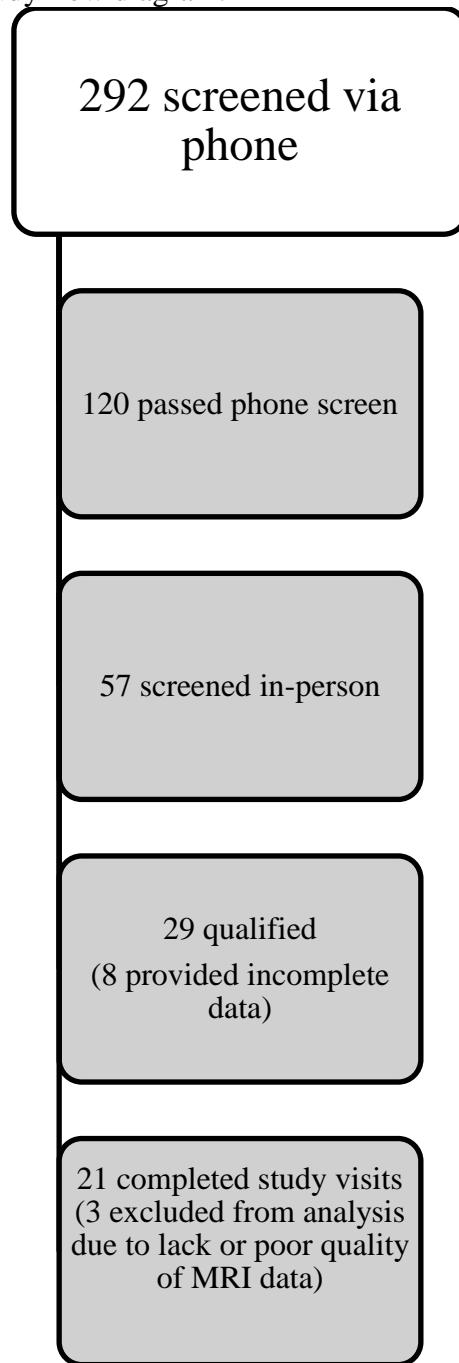

Supplement: NIHMS756722-supplement-125_2016_3874_MOESM2_ESM.pdf [file NIHMS756722-supplement-125_2016_3874_MOESM2_ESM.pdf]
